# Supplementary material for: Hyaluronan Mediated Motility Receptor (HMMR) Encodes an Evolutionarily Conserved Homeostasis, Mitosis, and Meiosis Regulator Rather than a Hyaluronan Receptor
Source: PubMed Central journal article supplement (PMC7226759; doi:10.3390/cells9040819), 2020-03-28
Supplement: cells-09-00819-s001.pdf [file cells-09-00819-s001.pdf]

**Table S1: HMMR and Miranda sequences and domains in insect species.** Predicted gene product names (indicated by an asterix) were produced from the NCBI eukaryotic gene prediction tool, Gnomon. The coiled coil was predicted using NPS@ prediction using a 21-residue window although 14- and 28- residue windows demonstrated similar results.

| Common name                      | Species;<br>Order                              | Pubmed ID<br>Name, *predicted      | # of<br>residues | N-terminal Domain (20 aa) | Coiled coil<br>(Residues) % total | Bzip<br>domain |
|----------------------------------|------------------------------------------------|------------------------------------|------------------|---------------------------|-----------------------------------|----------------|
| Human                            | <i>H. sapiens</i> ;<br><i>Primates</i>         | NP_001136028.1<br>HMMR             | 725              | MSFPKAPLKRFDNPSGCAPS      | (73-679) 84%                      | +              |
| Mouse                            | <i>Mus musculus</i>                            | AAH21427.1<br>Hmnr                 | 836              | MSFPKAPLKRFDNPSGCAPS      | (82-804) 86%                      | +              |
| African clawed<br>frog           | <i>Xenopus laevis</i>                          | NP_001087936.1<br>Hmnr             | 1175             | MSFPKAPLKRFDNEHIGCAPA     | (90-1146) 89%                     | +              |
| Termite                          | <i>Z. nevadensis</i> ;<br><i>Isoptera</i>      | XP_021929154.1<br>*Hmnr            | 1219             | MSFPRAKIQRFDATSCAPP       | (148-1125) 80%                    | +              |
| Brown<br>marmorated<br>stink bug | <i>H. halys</i> ;<br><i>Hemiptera</i>          | XP_014283477.1<br>*Hmnr            | 1241             | MSFPKARILRFNEEMTCAPP      | (145-1150) 81%                    | +              |
| Brown<br>planthopper             | <i>N. lugens</i> ;<br><i>Hemiptera</i>         | XP_022188703.1<br>*Hmnr            | 1107             | MSFPKAKLHRFNEEMTCAPP      | (111-1031) 83%                    | +              |
| Silverleaf<br>whitefly           | <i>B. tabaci</i> ;<br><i>Hemiptera</i>         | XP_018903570.1<br>*Hmnr            | 1198             | MSFAKAKIHRFNDDVSCAPP      | (111-1160) 88%                    | +              |
| Green peach<br>aphid             | <i>M. persicae</i> ;<br><i>Hemiptera</i>       | XP_022179692.1<br>*Hmnr            | 382              | MSFVKSIIKRFNEVSSCAPP      | (106-324) 57%                     | No             |
| Pea aphid                        | <i>A. pisum</i> ;<br><i>Hemiptera</i>          | XP_001945179.1<br>*Hmnr            | 382              | MSFVKSIIKRFNEVSSCAPP      | (106-323) 57%                     | No             |
| Russian wheat<br>aphid           | <i>D. noxia</i> ;<br><i>Hemiptera</i>          | XP_015371136.1<br>*Hmnr            | 381              | MSFVKSIIKRFNEVSSCAPP      | (106-322) 57%                     | No             |
| Ant                              | <i>D. quadriceps</i> ;<br><i>Hymenoptera</i>   | XP_014470916.1<br>*Hmnr            | 1011             | MSFSKAKIQRFNIGSEAPP       | (122-979) 85%                     | +              |
| Argentine ant                    | <i>L. humile</i> ;<br><i>Hymenoptera</i>       | XP_012229057.1<br>*Hmnr            | 1011             | MSFSKAKIQRFNELGSEAPP      | (110-974) 85%                     | +              |
| Common<br>eastern<br>bumble bee  | <i>B. impatiens</i> ;<br><i>Hymenoptera</i>    | XP_003491759.1<br>*Hmnr            | 1008             | MSFSKARIQRNFENDVPP        | (108-973) 86%                     | +              |
| Florida<br>carpenter ant         | <i>C. floridanus</i> ;<br><i>Hymenoptera</i>   | XP_011266101.1<br>*Hmnr            | 1009             | MSFSKARIQRFNELGSEAPP      | (109-977) 86%                     | +              |
| Honey bee                        | <i>A. mellifera</i> ;<br><i>Hymenoptera</i>    | XP_001121644.2<br>*Hmnr            | 1000             | MSFSKARIQRNFENDVPP        | (108-968) 86%                     | +              |
| Jerdon's<br>jumping ant          | <i>H. saltator</i> ;<br><i>Hymenoptera</i>     | XP_011151919.1<br>*Hmnr            | 1007             | MSFSKARIQRFNEMGSEAPP      | (124-969) 84%                     | +              |
| Little fire ant                  | <i>W. auropunctata</i> ;<br><i>Hymenoptera</i> | XP_011698344.1<br>*Hmnr            | 1010             | MSFSKARIQRNFASFADAPP      | (107-980) 86%                     | +              |
| Little honey<br>bee              | <i>A. florea</i> ;<br><i>Hymenoptera</i>       | XP_012350052.1<br>*Hmnr            | 999              | MSFSKARIQRNFENDVPP        | (108-967) 86%                     | +              |
| Orchid bee                       | <i>E. mexicana</i> ;<br><i>Hymenoptera</i>     | XP_017764489.1<br>*paramyosin-like | 1027             | MSFSKARIQRFNECENDVPP      | (109-985) 85%                     | +              |
| Parasitic<br>wood wasp           | <i>O. abietinus</i> ;<br><i>Hymenoptera</i>    | XP_012282310.1<br>*Hmnr            | 875              | MSFSKARIQRFNELGSEAPP      | (108-790) 78%                     | +              |
| Red fire ant                     | <i>S. invicta</i> ;<br><i>Hymenoptera</i>      | XP_011176081.1<br>*Hmnr            | 673              | MSFSKARIQRFNELGSDAPP      | (68-642) 85%                      | +              |
| Redheaded<br>pine sawfly         | <i>N. lecontei</i> ;<br><i>Hymenoptera</i>     | XP_015517286.1<br>*Hmnr            | 864              | MSFPARARIQRNFESNDVPP      | (108-844) 85%                     | +              |

| Southeastern blueberry bee | <i>H. laboriosa</i> ;<br><i>Hymenoptera</i>   | XP_017797889.1<br>*Hmnr                                                | 1009             | MSFSKARIQRFNEFENDVPP      | (111-977) 86%                     | +              |                     |
|----------------------------|-----------------------------------------------|------------------------------------------------------------------------|------------------|---------------------------|-----------------------------------|----------------|---------------------|
| Asian longhorned beetle    | <i>A. glabripennis</i> ;<br><i>Coleoptera</i> | XP_018571601.1<br>*Hmnr                                                | 863              | MSFSKAKIQEFNDIKPIAPG      | (100-834) 85%                     | +              |                     |
| Burying beetle             | <i>N. vespilloides</i> ;<br><i>Coleoptera</i> | XP_017783900.1<br>*Hmnr                                                | 885              | MSFSRAKLTRFNEKLPCTPS      | (100-787) 78%                     | +              |                     |
| Mountain pine beetle       | <i>D. ponderosae</i> ;<br><i>Coleoptera</i>   | XP_019761265.1<br>*polyamine-modulated factor 1-binding protein 1-like | 648              | MSFSKAKIIRFNDVNGNSKP      | (74-613) 83%                      | No             |                     |
| Red flour beetle           | <i>T. castaneum</i> ;<br><i>Coleoptera</i>    | XP_008191709<br>*Hmnr                                                  | 813              | MSFSKAKIQRFNDVKECTPS      | (102-780) 83%                     | +              |                     |
| Common name                | Species;<br>Order                             | Pubmed ID<br>Name, *prediction                                         | # of<br>residues | N-terminal Domain (20 aa) | Coiled coil<br>(Residues) % total | Bzip<br>domain | Homology<br>to Mira |
| American malaria mosquito  | <i>A. darlingi</i> ;<br><i>Diptera</i>        | ETN62704.1<br>Miranda                                                  | 885              | MSFSKAKLKRFDVPPVSSP       | (129-752) 70%                     | No             |                     |
| Fruit fly                  | <i>D. melanogaster</i> ;<br><i>Diptera</i>    | NP_477291.1<br>Miranda                                                 | 829              | MSFSKAKLKRFDVDVAICG       | (159-699) 65%                     | No             |                     |
| Fruit fly                  | <i>D. erecta</i> ;<br><i>Diptera</i>          | XP_015010478.1<br>(uncharacterized)                                    | 795              | MSFSKAKLKRFDVDTVACG       | (154-664) 64%                     | No             | 62%                 |
| Green bottle fly           | <i>L. cuprina</i> ;<br><i>Diptera</i>         | KNC26637.1<br>(hypothetical)                                           | 858              | MSFSKAKLKRFDIDVAACG       | (156-726) 66%                     | No             | 62%                 |
| House fly                  | <i>M. domestica</i> ;<br><i>Diptera</i>       | XP_005182574.1<br>*Uso1                                                | 830              | MSFSKAKLKRFDVDTVACG       | (157-701) 66%                     | No             | 62%                 |
| Mediterranean fruit fly    | <i>C. capitata</i> ;<br><i>Diptera</i>        | XP_004519307.1<br>*A-kinase anchor 9                                   | 841              | MSFSKAKLKRFDVDECAN        | (164-709) 65%                     | No             | 57%                 |
| Midge                      | <i>C. marinus</i> ;<br><i>Diptera</i>         | CRL00824.1<br>(unknown)                                                | 673              | MSFSKAKLKRFDITDFASP       | (115-580) 69%                     | No             | 19%                 |
| Snowberry fruit fly        | <i>R. zephyria</i> ;<br><i>Diptera</i>        | XP_017469429.1<br>*unconventional myosin XV11a isoformX1               | 884              | MSFSKAKLKRFDVDVDCAN       | (174-747) 65%                     | No             | 60%                 |
| Solanum fruit fly          | <i>B. latifrons</i> ;<br><i>Diptera</i>       | XP_018802054.1<br>*trichohyalin isoform X1                             | 873              | MSFSKAKLKRFDVDVDCAN       | (164-739) 66%                     | No             | 60%                 |
| Yellow fever mosquito      | <i>A. aegypti</i> ;<br><i>Diptera</i>         | XP_021707224.1<br>*Ddb, leucine-rich repeat containing protein         | 950              | MFSKAKLKRFDIPVSSPS        | (119-894) 82%                     | No             | 65%<br>Anopheles    |
